# Supplementary figures and images for: The evolution of biomass-burning aerosol size distributions due to coagulation: dependence on fire and meteorological details and parameterization
Source: Copernicus journal article supplement (doi:10.5194/acp-2016-9), 2016-02-25

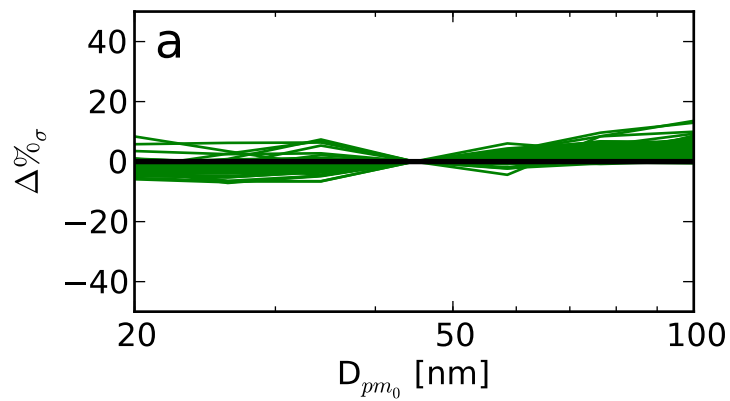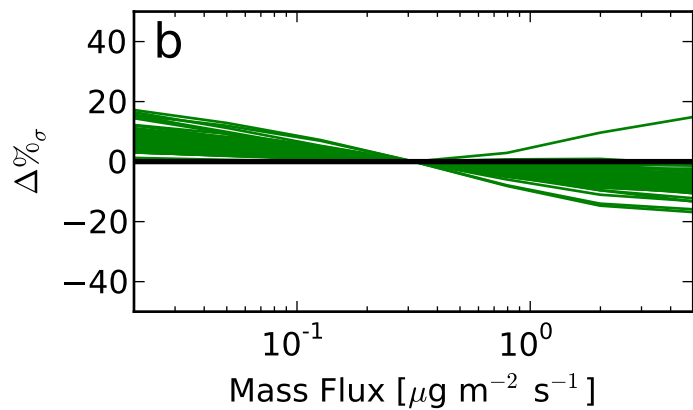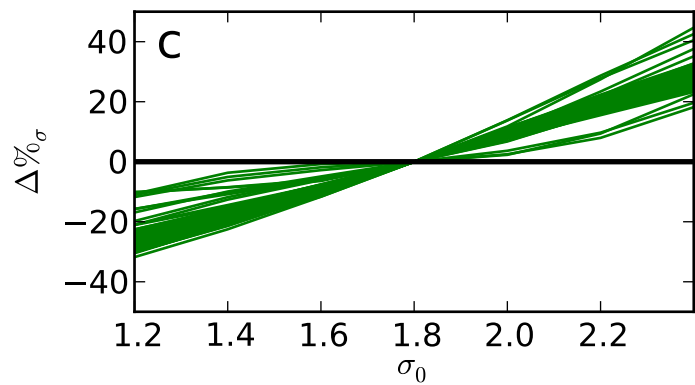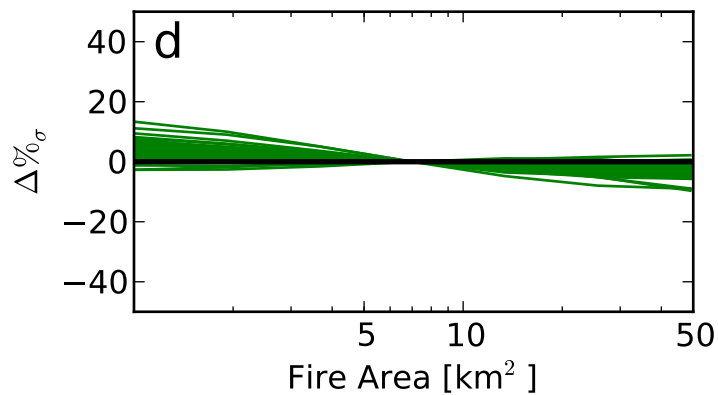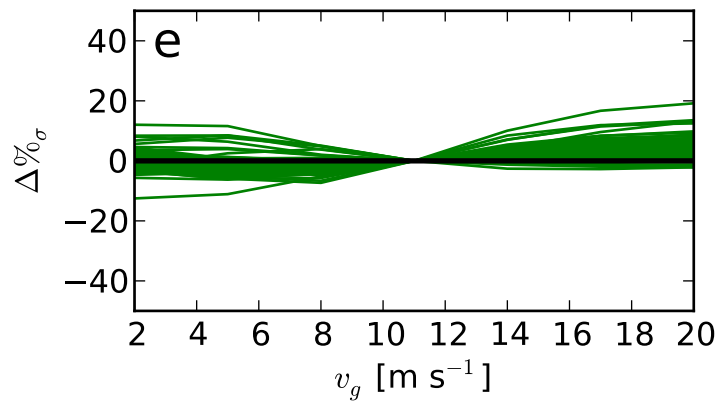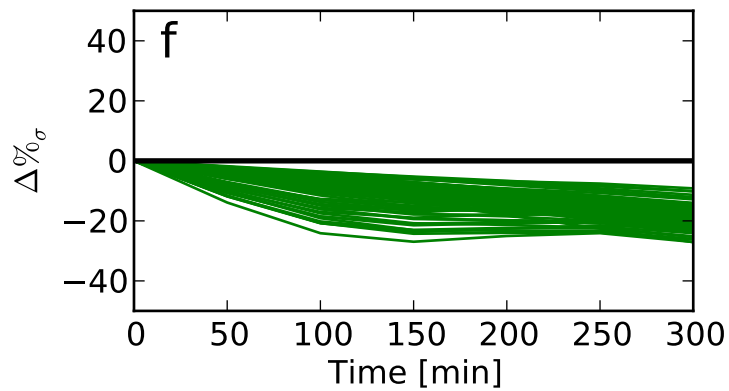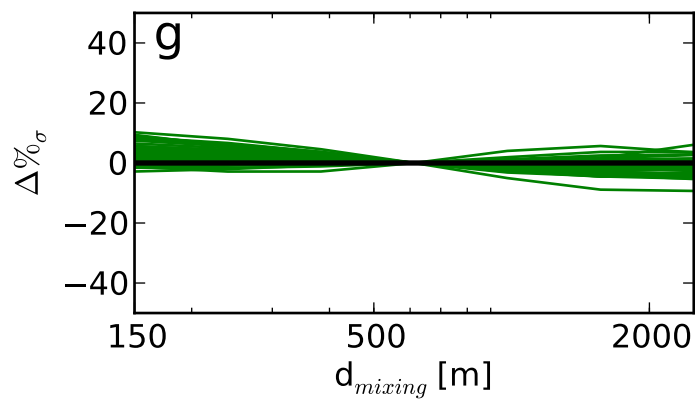

Supplement: Supplementary file 1 [file acp-2016-9-supplement.zip]
